# Supplementary material for: Predicting kinase inhibitors using bioactivity matrix derived informer sets
Source: PLOS journal article supplement (doi:10.1371/journal.pcbi.1006813), 2019-08-05
Supplement: S18 (10.1371/journal.pcbi.1006813.s018) [file journal.pcbi.1006813.s018]

## Algorithm pseudo-code

---

**ALGORITHM 1:** Regression Selection

---

Given the bioactivity vectors for all targets,  $\mathbf{x}_1, \dots, \mathbf{x}_m \in \mathbf{R}^n$ , and the size of informer set  $n_A$ ;  
Split the data into 5 folds, each fold with roughly the same number of targets;  
**for**  $K = 1, \dots, 5$  **do**  
    Take the  $K$ -th fold of the data as the test data, and the rest as the training set;  
    **for**  $j = 1, \dots, n$ ;  $\triangleright$  pre-processing  
        **do**  
            Linearly scale the features such that  $(\mathbf{x}_i)_j$  for all  $i$  in the training set lie in the range  $[0, 1]$ ;  
        **end**  
    **for**  $k = 2, 3, \dots$  **do**  
        Cluster the training data to  $k$  categories using kmeans++ with 100 repeats;  
        Select the informer set  $A$  with  $n_A$  features by the greedy heuristic based on the regularized logistic regression model (3) ;  
        Train a new logistic regression model (5) using the selected coordinates  $A$ ;  
        Use the logistic regression model to predict on the test set through (7) and evaluate the performance;  
    **end**  
**end**  
Rescale the whole data set just as in the cross validation procedure;  
Use the best  $k$  selected by cross validation to cluster the data;  
Use the greedy heuristic to select the informer set  $A$  with size  $n_A$ ;  
Train the logistic regression model (5) on the whole informer set  $A$  with all targets;

---

---

**ALGORITHM 2:** Coding Selection

---

Given the binary bioactivity data  $Z = \{z_{i,j}\}_{i \in I, j \in J}$ ;

Given a Monte Carlo sample size  $B$ ;

Fix informer set size  $n_A$ ;

Fix a grid  $\mathcal{K}$  of cluster sizes  $K$

**for**  $K \in \mathcal{K}$  **do**

**for**  $b = 1, \dots, B$  **do**

    Sample a set  $A_b$  uniformly at random from size- $n_A$  subsets of  $J$ ;

    Compute the code words (unique rows) of sub-matrix

$Z_{A_b} = \{z_{i,j}\}_{i \in I, j \in A_b}$ ;

    Let  $L_{A_b}$  equal the number of code words;

**if**  $L_{A_b} \geq K$  **then**

      Sample a partition  $\pi_b$  of the code words of size  $K$  blocks, uniformly at random

**end**

**if**  $L_{A_b} < K$  **then**

      Set  $\pi_b$  to be the unique partition having  $L_{A_b}$  blocks and constant code words within each block

**end**

    Calculate

$$f_{K,\lambda}(A_b, \pi_b) = \sum_{S_k \in \pi_b} \left( \sum_{i, i' \in S_k} \left\{ 1 - \frac{\sum_{j \in A_b^c} z_{ij} z_{i'j}}{\sum_{j \in A_b^c} z_{ij} \vee z_{i'j}} \right\} \right) - \lambda L_{A_b}$$

**end**

**end**

Rank compounds  $j \in J$  by

$$f_j = \sum_{K \in \mathcal{K}} \frac{1}{B} \sum_{b=1}^B 1(j \in A_b) f_{K,\lambda}(A_b, \pi_b)$$

Select the best (lowest scoring)  $n_A$  compounds as the informer set.

Prioritize: Rank non-informer compounds as in Eq. (10).

---

---

**ALGORITHM 3:** Adaptive Selection

---

**Input**

- initial bioactivity data  $X = \{x_{i,j}\}_{i \in I, j \in J}$
- a base informer set size  $n_0 = 8$ ; final informer set size  $n_A > n_0$ .

**Cluster targets**

- Calculate a cluster number  $K$  using Eq. (12)
- Cluster targets  $I$  into  $K$  clusters using `kmeans` applied to all rows of  $X$

**Construct a base informer set  $A_0$** 

- Fit a generalized linear model predicting multi-class cluster labels using R package `glmnet`, with the group LASSO penalty, and setting the penalty parameter to identify  $n_0$  compounds that are best cluster label predictors

**Adaptively expand****for** *Informer sets of size increasing by one until size  $n_A$*  **do**    Add one extra compound  $j$  to  $A_o$  by Equation (13);

$$\arg \min_{j \notin A_o} \sum_{k \notin A_o \cup \{j\}} \|\mathbf{x}_{\cdot k} - \mathbf{c}_n\|_2$$

    where  $\mathbf{c}_n = \frac{1}{|A_o \cup \{j\}|} \sum_{k \in A_o \cup \{j\}} \mathbf{x}_{\cdot k}$ .**end****Prioritize:** Rank non-informer compounds as in Eq. (10).

---
